# Supplementary material
Source: publisher figshare collection journal article supplement (https://acs.figshare.com/ndownloader/files/4748146)
Supplement: Supplementary file 1 [file 4748146]

## SUPPORTING INFORMATION

belonging to the paper

### Correlation between ZnO nanowire growth and the surface of AlN substrate

Sang Hyun Lee\*, In-Ho Im, Hyun Jung Lee, Zahra Vashaei, Takashi Hanada, Meoung-Whan Cho, and Takafumi Yao

Center for interdisciplinary Research, Tohoku University 6-3, Aramaki, Aoba-ku, Sendai, 980-8578, JAPAN, Tel : +81-22-795-4404, Fax : +81-22-795-7810

e-mail : [shlee@cir.tohoku.ac.jp](mailto:shlee@cir.tohoku.ac.jp)

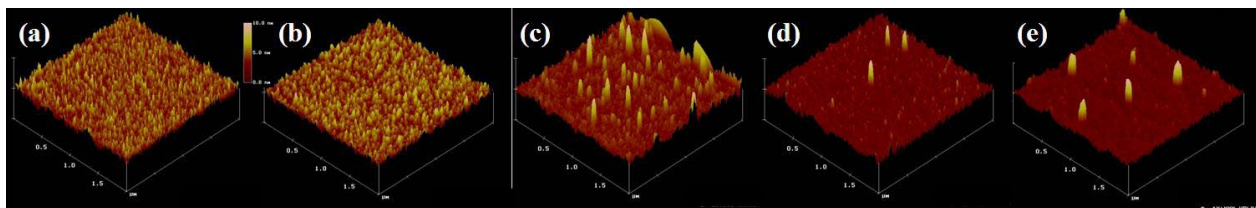

**Fig. S1** Surface roughness evolution, measured by AFM, of AlN layers with the HF treatment time. (a-e) samples are a) As-grown, b) 1 min, c) 2 min, d) 3 min, and e) 4 min etched AlN epilayer and average roughness (RMS) were 0.846, 0.747, 1.155, 0.782, and 0.892 nm, respectively.
